# Supplementary material for: Trimeric, APC-Targeted Subunit Vaccines Protect Mice against Seasonal and Pandemic Influenza
Source: PubMed Central journal article supplement (PMC9972960; doi:10.1128/jvi.01694-22), 2023-01-31
Supplement: jvi.01694-22-s0001.pdf [file jvi.01694-22-s0001.pdf]

## Supplementary Material

**Supplementary Table I:** Overview of the constructed vaccines

| Vaccine number | Name                | Targeting domain     | Antigen                       | Gene Accession No | C-term Foldon |
|----------------|---------------------|----------------------|-------------------------------|-------------------|---------------|
| 1              | $\alpha$ MHCII-H1-F | Anti-MHCII           | H1(A/Puerto Rico/8/1934)      | V01088            | yes           |
| 2              | $\alpha$ MHCII-H1   | Anti-MHCII           | H1(A/Puerto Rico/8/1934)      | V01088            | no            |
| 3              | MIP1 $\alpha$ -H1-F | MIP1 $\alpha$ (CCL3) | H1(A/Puerto Rico/8/1934)      | V01088            | yes           |
| 4              | MIP1 $\alpha$ -H1   | MIP1 $\alpha$ (CCL3) | H1(A/Puerto Rico/8/1934)      | V01088            | no            |
| 5              | $\alpha$ NIP-H1-F   | $\alpha$ NIP         | H1(A/Puerto Rico/8/1934)      | V01088            | yes           |
| 6              | $\alpha$ NIP-H1     | $\alpha$ NIP         | H1(A/Puerto Rico/8/1934)      | V01088            | no            |
| 7              | $\alpha$ MHCII-CA07 | Anti-MHCII           | H1(A/California/07/2009)      | CY266191          | no            |
| 8              | $\alpha$ MHCII-H5   | Anti-MHCII           | H5(A/Vietnam/1194/2004)       | EF541402          | no            |
| 9              | $\alpha$ MHCII-H9   | Anti-MHCII           | H9(A/Hong Kong/1073/99(H9N2)) | AJ404626          | no            |

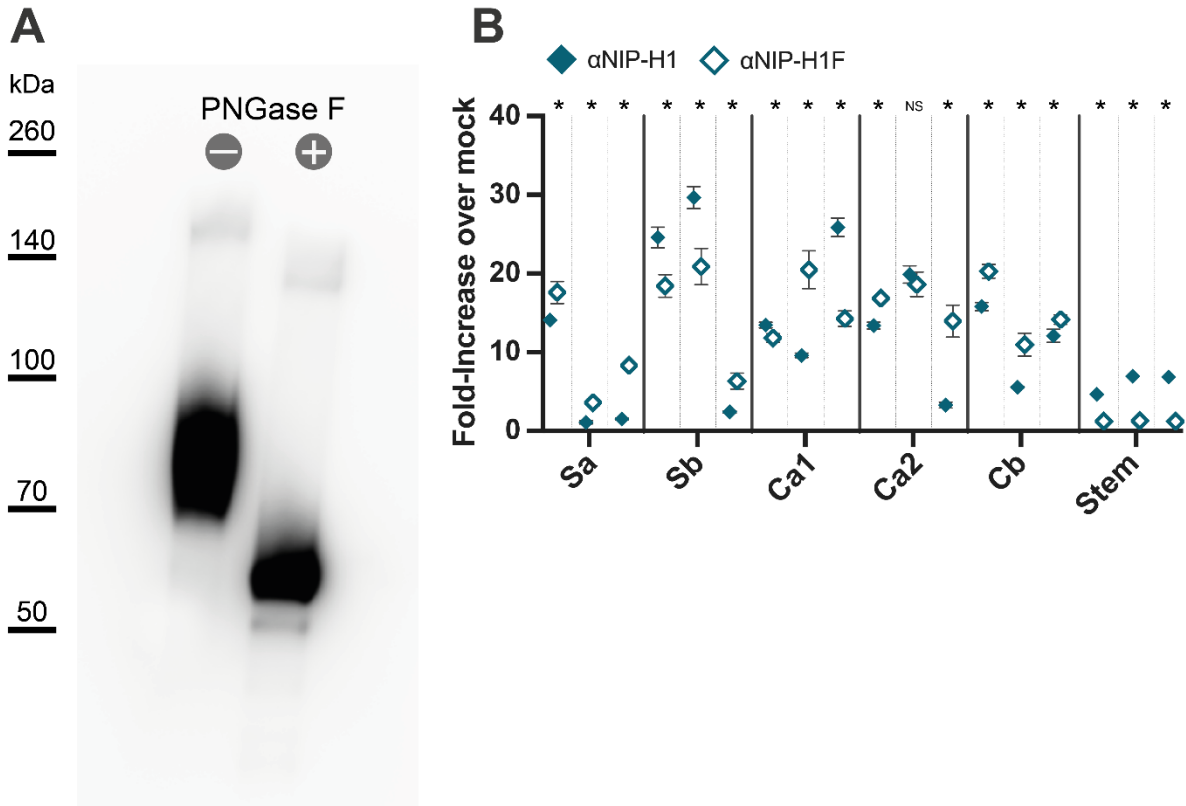

**Supplementary Figure 1: HA epitope binding and glycosylation** (A) Deglycosylation of recombinant PR8 protein analyzed by Western Blot to elucidate contribution of glycosides on vaccine size. PR8 protein (2.25 $\mu$ g) were treated with PNGase F under denaturing conditions according to the manufacturer's instructions (Cat No. P0704S, New England BioLabs). (B) Fold-increase in AUC from ELISA corresponding to Figure 1F. Instead of classifying an epitope as positive based on mean+5 $\times$ SEM of the mock as in Figure 1F, here the ratio of AUC<sub>sample</sub> over AUC<sub>mock</sub> for each mAb in triplicate is calculated and displayed.

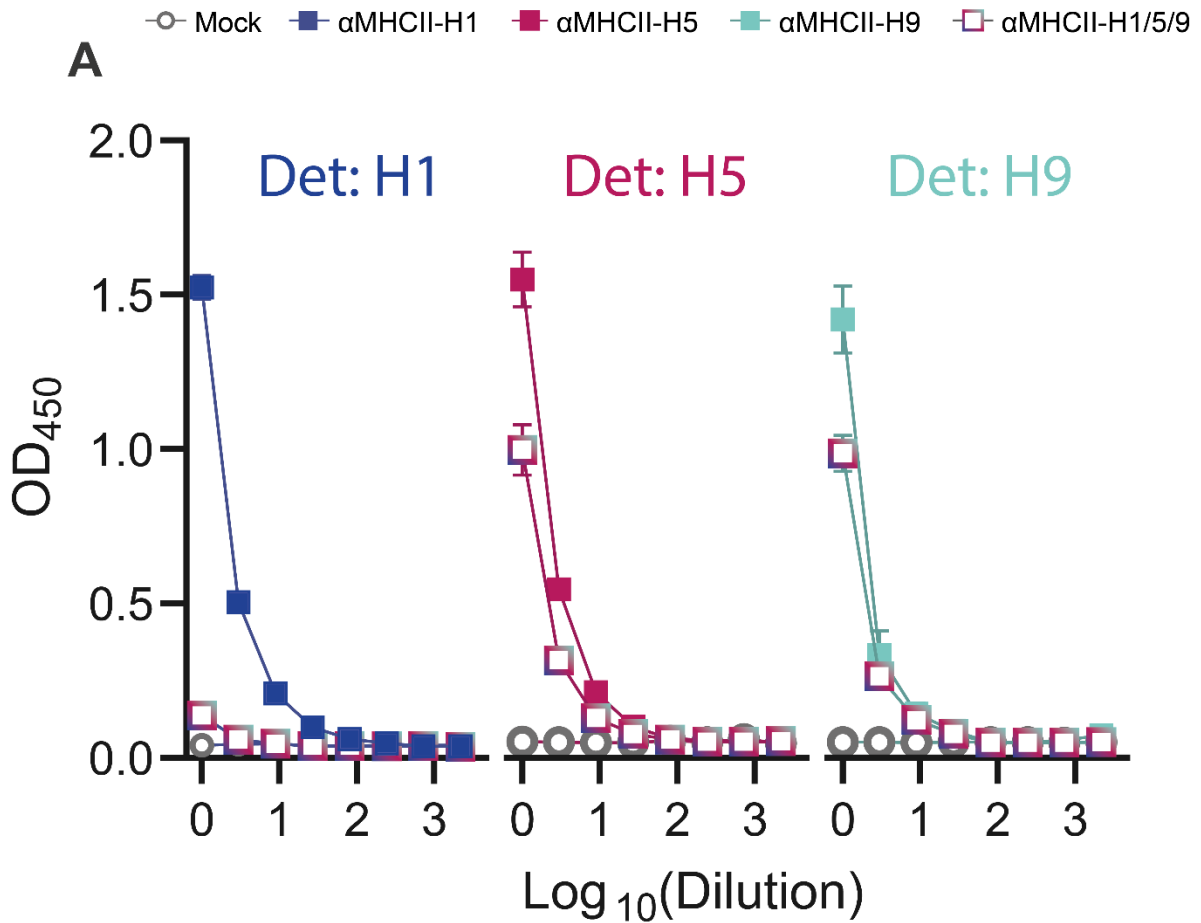

**Supplementary Figure 2. In vitro transfection of vaccines encoding influenza H1, H5 and H9.** The indicated vaccine plasmids were transiently transfected into HEK293E cells, and vaccine proteins evaluated by ELISA coated with NIP-BSA. Detection was with HA specific mAbs against H1 (clone: H36-4-52), H5 (Cat No. 11048-MM14, Sino Biologicals), or H9 (Cat No. 11229-MM09, Sino Biologicals), as indicated (n=3).

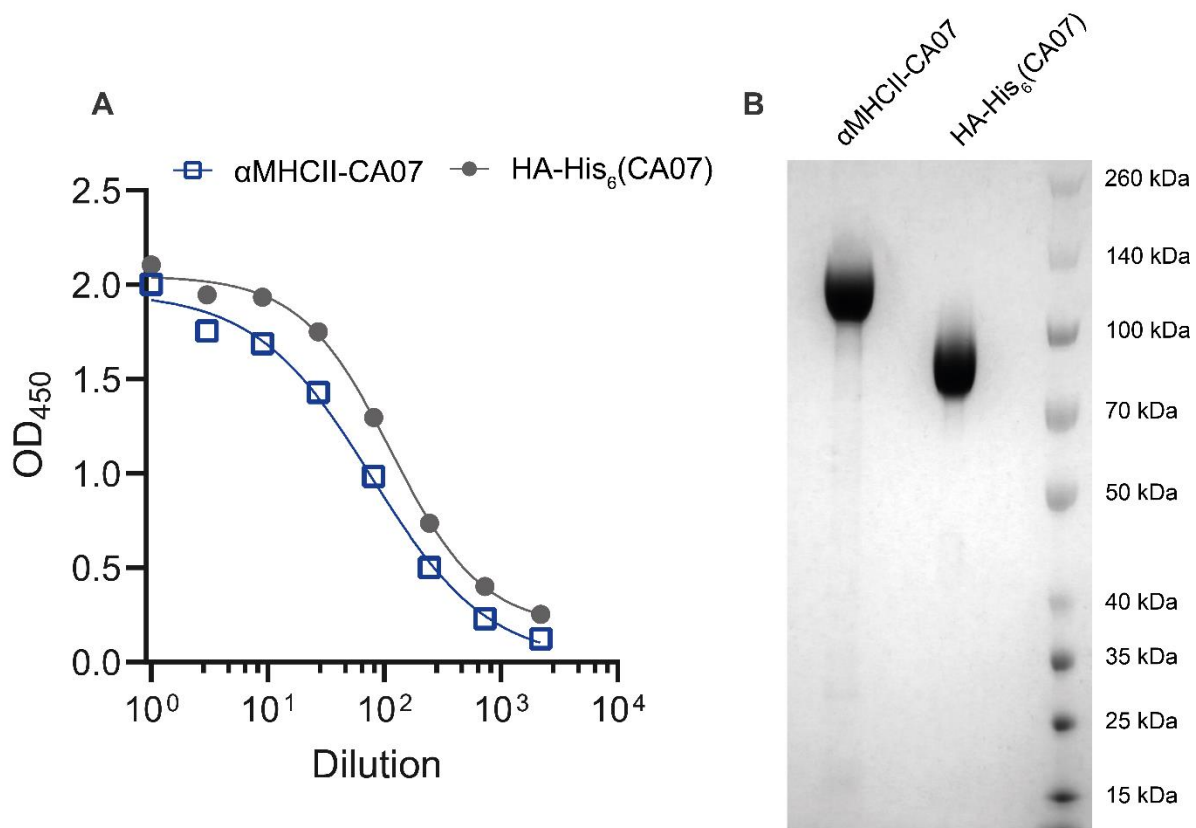

**Supplementary Figure 3: Production of protein vaccine  $\alpha$ MHCII-CA07.** HEK293E cells were transfected with plasmids encoding  $\alpha$ MHCII-CA07, and the produced proteins affinity purified on an anti-CA07 column (produced in-house, mAb clone: 29E3). **(A)** ELISA analysis of purified  $\alpha$ MHCII-CA07 as compared to recombinant HA (CA07) (Cat No. 11085-V08H, Sino Biological). Both samples were loaded in 1  $\mu$ g/ml in row A, and then serially diluted 3-fold. Capture and detection was performed with the CA07 specific ELISA pair set (Cat No. SEK001, Sino Biologicals). **(B)** SDS-PAGE analysis of purified  $\alpha$ MHCII-CA07 as compared to the recombinant protein control from A. Proteins were loaded in 5 $\mu$ g on a Bolt™ 4-12% Bis-Tris gel (Cat No. NW04125BOX, Thermo Fisher) under denaturing conditions. Left band:  $\alpha$ MHCII-CA07 with a theoretical size of 90 kDa. Right band: control protein with theoretical size of 59 kDa.

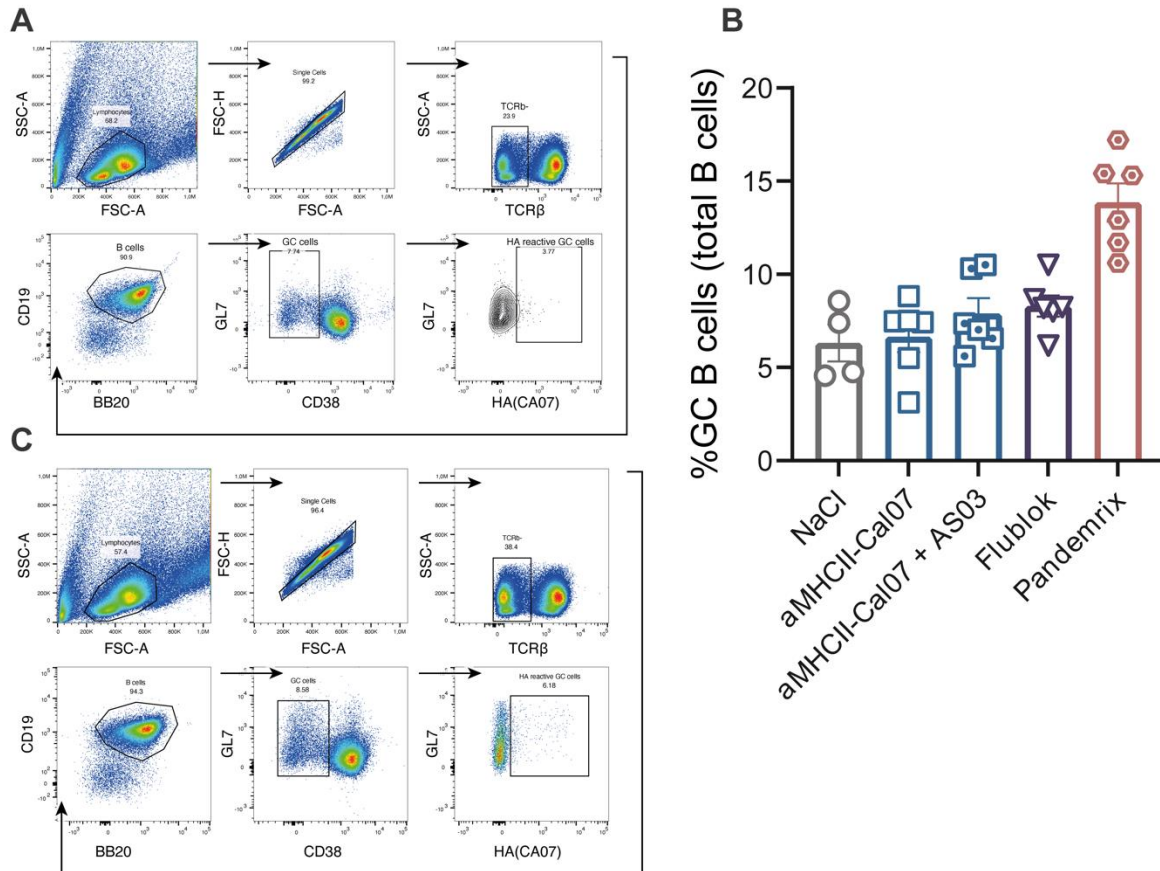

**Supplementary Figure 4: Flow analysis of GC B cells.** Inguinal lymph nodes (draining) were harvested at 14 days post vaccination. **(A)** Representative gating strategy for HA-reactive GC cells with HA-tetramer based staining. Cells were classified as: Single cells, TCR $\beta^{\text{neg}}$ , CD19 $^{\text{pos}}$ , B220 $^{\text{pos}}$ , CD38 $^{\text{neg}}$ , GL7 $^{\text{pos}}$ , HA $^{\text{pos}}$ . **(B)** Frequency of GC B cells (% of total B cells) for mice vaccinated with the indicated vaccines, HA-tetramer based staining. **(C)** Representative gating strategy for HA-reactive GC cells with HA-Klickmer<sup>®</sup> based staining.
